# Supplementary material for: Alleviation of behavioral hypersensitivity in mouse models of inflammatory pain with two structurally different casein kinase 1 (CK1) inhibitors
Source: PubMed Central journal article supplement (PMC4008364; doi:10.1186/1744-8069-10-17), 2014-03-10
Supplement: 1744-8069-10-17-S1.pdf [file 1744-8069-10-17-S1.pdf]

**Additional file 1: Carrageenan- and CFA-induced inflammation did not upregulate**

**CK1 $\alpha$ ,  $\delta$  and  $\epsilon$  expression.** Immunoblot analyses of CK1 $\alpha$  (A),  $\delta$  (B) and  $\epsilon$  (C)

expression levels in the spinal cord and DRGs. L4-6 spinal segments and DRGs

ipsilateral to the inflammation were dissected 6 hours after carrageenan (Car) and 3

days after CFA injection. As a control, saline (Sal) and incomplete Freund's adjuvant

(IFA) were injected instead of Car and CFA, respectively.

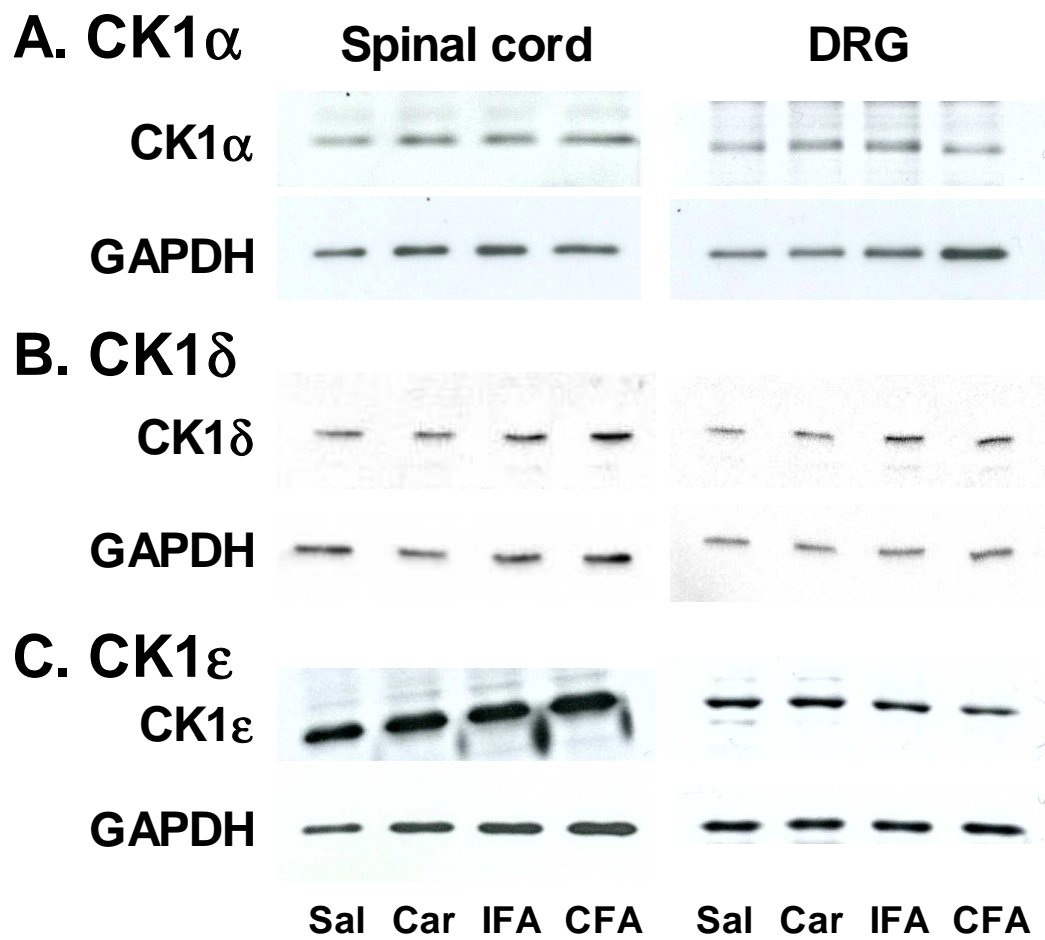

Kurihara et al. Additional file 1
