# Supplementary material for: Alleviation of behavioral hypersensitivity in mouse models of inflammatory pain with two structurally different casein kinase 1 (CK1) inhibitors
Source: PubMed Central journal article supplement (PMC4008364; doi:10.1186/1744-8069-10-17), 2014-03-10
Supplement: 1744-8069-10-17-S2.pdf [file 1744-8069-10-17-S2.pdf]

**Additional file 2. Comparison of passive membrane properties among L5 SG neurons obtained from control and inflamed mice.**

|                 | RMP (mV)                           | IMR (M $\Omega$ )                 |
|-----------------|------------------------------------|-----------------------------------|
| Naïve           | - 66.4 $\pm$ 1.44 ( <i>n</i> = 17) | 636.7 $\pm$ 114.2 ( <i>n</i> = 7) |
| Saline 6 h      | - 66.7 $\pm$ 1.35 ( <i>n</i> = 17) | 664.7 $\pm$ 55.3 ( <i>n</i> = 16) |
| Carrageenan 6 h | - 63.9 $\pm$ 1.04 ( <i>n</i> = 32) | 713.2 $\pm$ 49.4 ( <i>n</i> = 12) |
| IFA 3d          | - 67.8 $\pm$ 2.23 ( <i>n</i> = 9)  | 614.1 $\pm$ 76.4 ( <i>n</i> = 7)  |
| CFA 3d          | - 62.9 $\pm$ 1.05 ( <i>n</i> = 44) | 566.2 $\pm$ 52.5 ( <i>n</i> = 26) |

Carrageenan and CFA inflammation did not change resting membrane potential (RMP) or input membrane resistance (IMR). Spinal cord slices were prepared 6 hours after carrageenan or 3 days after CFA injection and blind whole-cell patch-clamp recordings were made from the SG neurons ipsilateral to carrageenan or CFA injection. As a control, saline and incomplete Freund's adjuvant (IFA) were injected instead of carrageenan and CFA, respectively. Each value represents the mean  $\pm$  SEM.

**Kurihara et al. Additional file 2**
